# Supplementary material
Source: PubMed Central journal article supplement (PMC3163780)
Supplement: NIHMS314148-supplement-01.pdf [file NIHMS314148-supplement-01.pdf]

## Appendix A. Supplementary Data

**Article Title:** Heavy Metal and Pesticide Content in Commonly Prescribed Individual Raw Chinese Herbal Medicines

**Author List:**

Eric S. J. HARRIS  
Shugeng CAO  
Bruce A. LITTLEFIELD  
Jane A. CRAYCROFT  
Robert SCHOLTEN  
Ted KAPTCHUK  
Yanling FU  
Wenquan WANG  
Yong LIU  
Hubiao CHEN  
Zhongzhen ZHAO  
Jon CLARDY  
Alan D. WOOLF  
David M. EISENBERG

---

### Supplementary Data, Table of Contents:

| <i>Page #</i> | <i>Contents</i>                                                                                                                                                              |
|---------------|------------------------------------------------------------------------------------------------------------------------------------------------------------------------------|
| 1             | <b>Title Page</b>                                                                                                                                                            |
| 2 – 3         | <b>Supplementary Data, Table S1.</b> List of plant species included in the study (N=126).                                                                                    |
| 4             | <b>Supplementary Data, Table S2.</b> List of all pesticide residues screened (N=162).                                                                                        |
| 5 – 7         | <b>Supplementary Data, Table S3.</b> Reference values for pesticides and heavy metals.                                                                                       |
| 8             | <b>Supplementary Data, Table S4.</b> Summary of pesticide residues detected (LOD=10–50 ppb; total of 162 pesticides screened) in raw Chinese Herbal Medicines (Total N=294). |
| 9             | <b>References</b>                                                                                                                                                            |

**Supplementary Data, Table S1.** List of plant species included in the study (N=126).

| Scientific Name (as listed in the Chinese Pharmacopoeia (CPC 2005))    | Pin Yin Name        | Medicinal Part       |
|------------------------------------------------------------------------|---------------------|----------------------|
| <i>Acanthopanax senticosus</i> (Rupr. ex Maxim.) Harms                 | Ci Wu Jia           | Root, Rhizome & Stem |
| <i>Achyranthes bidentata</i> Bl.                                       | Niu Xi              | Root                 |
| <i>Acorus tatarinowii</i> Schott                                       | Shi Chang Pu        | Rhizome              |
| <i>Agrimonia pilosa</i> Ledeb.                                         | Xian He Cao         | Leaf & Stem          |
| <i>Akebia quinata</i> (Thunb.) Decne.                                  | Mu Tong             | Stem                 |
| <i>Alisma orientalis</i> (Sam.) Juzep.                                 | Ze Xie              | Tuber                |
| <i>Alpinia officinarum</i> Hance                                       | Gao Liang Jiang     | Rhizome              |
| <i>Alpinia oxyphylla</i> Miq.                                          | Yi Zhi              | Fruit                |
| <i>Amomum villosum</i> Lour.                                           | Sha Ren             | Fruit                |
| <i>Andrographis paniculata</i> (Burm. f.) Nees                         | Chuan Xin Lian      | Leaf & Stem          |
| <i>Apocynum venetum</i> L.                                             | Luo Bu Ma Ye        | Leaf                 |
| <i>Arctium lappa</i> L.                                                | Niu Bang Zi         | Fruit                |
| <i>Areca catechu</i> L.                                                | Da Fu Pi            | Fruit                |
| <i>Artemisia annua</i> L.                                              | Qing Hao            | Leaf & Stem          |
| <i>Artemisia argyi</i> Lévl. et Vant                                   | Ai Ye               | Leaf                 |
| <i>Artemisia capillaris</i> Thunb.                                     | Yin Chen            | Leaf & Stem          |
| <i>Asarum heterotropoides</i> var. <i>mandshuricum</i> (Maxim.) Kitag. | Xi Xin              | Root & Rhizome       |
| <i>Aster tataricus</i> L. f.                                           | Zi Wan              | Root & Rhizome       |
| <i>Astragalus membranaceus</i> var. <i>mongholicus</i> (Bge.) Hsiao    | Huang Qi            | Root                 |
| <i>Atractylodes macrocephala</i> Koidz.                                | Bai Zhu             | Rhizome              |
| <i>Belamcanda chinensis</i> (L.) DC.                                   | She Gan             | Rhizome              |
| <i>Brassica juncea</i> (L.) Czern. et Coss.                            | Jie Zi              | Seed                 |
| <i>Brucea javanica</i> (L.) Merr.                                      | Ya Dan Zi           | Fruit                |
| <i>Bupleurum chinense</i> DC.                                          | Chai Hu             | Root                 |
| <i>Cassia tora</i> L.                                                  | Jue Ming Zi         | Seed                 |
| <i>Celosia cristata</i> L.                                             | Ji Guan Hua         | Flower               |
| <i>Chaenomeles speciosa</i> (Sweet) Nakai                              | Mu Gua              | Fruit                |
| <i>Chrysanthemum indicum</i> L.                                        | Ye Ju Hua           | Flower               |
| <i>Chrysanthemum morifolium</i> Ramat.                                 | Ju Hua              | Flower               |
| <i>Citrus aurantium</i> L.                                             | Zhi Qiao            | Fruit                |
| <i>Citrus medica</i> var. <i>sarcodactylis</i> Swingle                 | Fo Shou             | Fruit                |
| <i>Citrus reticulata</i> Blanco                                        | Chen Pi             | Fruit                |
| <i>Clematis chinensis</i> Osbeck                                       | Wei Ling Xian       | Root & Rhizome       |
| <i>Codonopsis pilosula</i> (Franch.) Nannf.                            | Dang Shen           | Root                 |
| <i>Coix lacryma-jobi</i> L.                                            | Yi Yi Ren           | Seed                 |
| <i>Coptis chinensis</i> Franch.                                        | Huang Lian          | Rhizome              |
| <i>Cornus officinalis</i> Sieb. et Zucc.                               | Shan Zhu Yu         | Fruit                |
| <i>Corydalis yanhusuo</i> W. T. Wang                                   | Yan Hu Suo          | Tuber                |
| <i>Cynanchum atratum</i> Bge.                                          | Bai Wei             | Root & Rhizome       |
| <i>Cynanchum paniculatum</i> (Bge.) Kitag.                             | Xu Chang Qing       | Root & Rhizome       |
| <i>Dianthus chinensis</i> L.                                           | Qu Mai              | Leaf & Stem          |
| <i>Dictamnus dasycarpus</i> Turcz.                                     | Bai Xian Pi         | Root                 |
| <i>Dimocarpus longan</i> Lour.                                         | Long Yan Rou        | Fruit                |
| <i>Dioscorea nipponica</i> Makino                                      | Chuan Shan Long     | Rhizome              |
| <i>Dioscorea opposita</i> Thunb.                                       | Shan Yao            | Rhizome              |
| <i>Dipsacus asperoides</i> C.Y. Cheng et T.M. Ai                       | Xu Duan             | Root                 |
| <i>Dolichos lablab</i> L.                                              | Bai Bian Dou        | Seed                 |
| <i>Echinops latifolius</i> Tausch                                      | Yu Zhou Lou Lu      | Root                 |
| <i>Epimedium brevicornum</i> Maxim.                                    | Yin Yang Huo        | Leaf & Stem          |
| <i>Eriobotrya japonica</i> (Thunb.) Lindl.                             | Pi Pa Ye            | Leaf                 |
| <i>Evodia rutaecarpa</i> (Juss.) Benth.                                | Wu Zhu Yu           | Fruit                |
| <i>Forsythia suspensa</i> (Thunb.) Vahl                                | Lian Qiao           | Fruit                |
| <i>Fritillaria cirrhosa</i> D. Don                                     | Chuan Bei Mu        | Bulb                 |
| <i>Ganoderma lucidum</i> (Curtis) Karst.                               | Ling Zhi            | Fungus               |
| <i>Gardenia jasminoides</i> Ellis                                      | Zhi Zi              | Fruit                |
| <i>Gentiana macrophylla</i> Pall.                                      | Qin Jiao            | Root                 |
| <i>Ginkgo biloba</i> L.                                                | Bai Guo             | Seed                 |
| <i>Glehnia littoralis</i> F. Schmidt ex Miq.                           | Bei Sha Shen        | Root                 |
| <i>Glycyrrhiza uralensis</i> Fisch.                                    | Gan Cao             | Root & Rhizome       |
| <i>Hedyotis diffusa</i> Willd.                                         | Bai Hua She She Cao | Leaf & Stem          |
| <i>Houttuynia cordata</i> Thunb.                                       | Yu Xing Cao         | Leaf & Stem          |
| <i>Illicium verum</i> Hook. f.                                         | Ba Jiao Hui Xiang   | Fruit                |
| <i>Imperata cylindrica</i> var. <i>major</i> (Nees) C. E. Hubb.        | Bai Mao Gen         | Rhizome              |
| <i>Inula japonica</i> Thunb.                                           | Jin Fei Cao         | Leaf & Stem          |
| <i>Isatis indigotica</i> Fort.                                         | Ban Lan Gen         | Root                 |
| <i>Juncus effusus</i> L.                                               | Deng Xin Cao        | Stem                 |
| <i>Kaempferia galanga</i> L.                                           | Shan Nai            | Rhizome              |
| <i>Kochia scoparia</i> (L.) Schrad.                                    | Di Fu Zi            | Fruit                |

| Scientific Name (as listed in the Chinese Pharmacopoeia (CPC 2005)) | Pin Yin Name    | Medicinal Part |
|---------------------------------------------------------------------|-----------------|----------------|
| <i>Leonurus heterophyllus</i> Sweet.                                | Yi Mu Cao       | Leaf & Stem    |
| <i>Ligusticum chuanxiong</i> Hort.                                  | Chuan Xiong     | Rhizome        |
| <i>Ligustrum lucidum</i> Ait.                                       | Nu Zhen Zi      | Fruit          |
| <i>Lindera aggregata</i> (Sims) Kosterm                             | Wu Yao          | Tuber          |
| <i>Lobelia chinensis</i> Lour.                                      | Ban Bian Lian   | Whole Plant    |
| <i>Lonicera japonica</i> Thunb.                                     | Jin Yin Hua     | Flower         |
| <i>Lophatherum gracile</i> Brongn.                                  | Dan Zhu Ye      | Leaf & Stem    |
| <i>Lycium barbarum</i> L.                                           | Gou Qi Zi       | Fruit          |
| <i>Lycopus lucidus</i> var. <i>hirtus</i> Regel                     | Ze Lan          | Leaf & Stem    |
| <i>Melia toosendan</i> Sieb. et Zucc.                               | Chuan Lian Zi   | Fruit          |
| <i>Menispermum dauricum</i> DC.                                     | Bei Dou Gen     | Rhizome        |
| <i>Mentha haplocalyx</i> Briq.                                      | Bo He           | Leaf & Stem    |
| <i>Momordica cochinchinensis</i> (Lour.) Spreng.                    | Mu Bie Zi       | Seed           |
| <i>Momordica grosvenori</i> Swingle                                 | Luo Han Guo     | Fruit          |
| <i>Morus alba</i> L.                                                | Sang Ye         | Leaf           |
| <i>Paeonia lactiflora</i> Pall.                                     | Bai Shao        | Root           |
| <i>Paeonia suffruticosa</i> Andr.                                   | Mu Dan Pi       | Root           |
| <i>Paeonia veitchii</i> Lynch.                                      | Chi Shao        | Root           |
| <i>Panax ginseng</i> C.A. Mey.                                      | Ren Shen        | Root           |
| <i>Panax notoginseng</i> (Burk.) F.H. Chen                          | San Qi          | Root           |
| <i>Perilla frutescens</i> (L.) Britt.                               | Zi Su Zi        | Fruit          |
| <i>Phragmites communis</i> Trin.                                    | Lu Gen          | Rhizome        |
| <i>Piper nigrum</i> L.                                              | Hu Jiao         | Fruit          |
| <i>Platycodon grandiflorum</i> (Jacqui) A. DC.                      | Jie Geng        | Root           |
| <i>Pogostemon cablin</i> (Blanco) Benth.                            | Guang Huo Xiang | Leaf & Stem    |
| <i>Polygala tenuifolia</i> Willd.                                   | Yuan Zhi        | Root           |
| <i>Polygonum aviculare</i> L.                                       | Bian Xu         | Leaf & Stem    |
| <i>Polygonum cuspidatum</i> Sieb. et Zucc.                          | Hu Zhang        | Root & Rhizome |
| <i>Polygonum multiflorum</i> Thunb.                                 | He Shou Wu      | Tuber          |
| <i>Poria cocos</i> (Schw.) Wolf                                     | Fu Ling         | Fungus         |
| <i>Portulaca oleracea</i> L.                                        | Ma Chi Xian     | Leaf & Stem    |
| <i>Prunus armeniaca</i> var. <i>ansu</i> Maxim.                     | Ku Xing Ren     | Seed           |
| <i>Pseudostellaria heterophylla</i> (Miq.) Pax ex Pax et Hoffm.     | Tai Zi Shen     | Tuber          |
| <i>Pueraria lobata</i> (Willd.) Ohwi                                | Ge Gen          | Root           |
| <i>Rehmannia glutinosa</i> Libosch.                                 | Di Huang        | Tuber          |
| <i>Rheum palmatum</i> L.                                            | Da Huang        | Root & Rhizome |
| <i>Rosa laevigata</i> Michx.                                        | Jin Ying Zi     | Fruit          |
| <i>Rosa rugosa</i> Thunb.                                           | Mei Gui Hua     | Flower         |
| <i>Rubia cordifolia</i> L.                                          | Qian Cao        | Root & Rhizome |
| <i>Salvia multiorrhiza</i> Bge.                                     | Dan Shen        | Root & Rhizome |
| <i>Saposhnikovia divaricata</i> (Turcz.) Schischk.                  | Fang Feng       | Root           |
| <i>Sarcandra glabra</i> (Thunb.) Nakai                              | Zhong Jie Feng  | Whole Plant    |
| <i>Schisandra chinensis</i> (Turcz.) Baill.                         | Wu Wei Zi       | Fruit          |
| <i>Scutellaria baicalensis</i> Georgi                               | Huang Qin       | Root           |
| <i>Siegesbeckia orientalis</i> L.                                   | Xi Xian Cao     | Leaf & Stem    |
| <i>Silybum marianum</i> (L.) Gaertn.                                | Shui Fei Ji     | Fruit          |
| <i>Sophora flavescens</i> Ait.                                      | Ku Shen         | Root           |
| <i>Sparganium stoloniferum</i> Buch.-Ham.                           | San Leng        | Rhizome        |
| <i>Stellaria dichotoma</i> var. <i>lanceolata</i> Bge.              | Yin Chai Hu     | Root           |
| <i>Trachelospermum jasminoides</i> (Lindl.) Lem.                    | Luo Shi Teng    | Leaf & Stem    |
| <i>Tribulus terrestris</i> L.                                       | Ji Li           | Fruit          |
| <i>Tussilago farfara</i> L.                                         | Kuan Dong Hua   | Flower         |
| <i>Uncaria rhynchophylla</i> (Miq.) Jacks.                          | Gou Teng        | Stem           |
| <i>Verbena officinalis</i> L.                                       | Ma Bian Cao     | Leaf & Stem    |
| <i>Xanthium sibiricum</i> Patr.                                     | Cang Er Zi      | Fruit          |
| <i>Zanthoxylum bungeanum</i> Maxim.                                 | Hua Jiao        | Fruit          |
| <i>Ziziphus jujuba</i> var. <i>inermis</i> (Bunge) Rehd             | Da Zao          | Fruit          |
| <i>Ziziphus jujuba</i> var. <i>spinosa</i> (Bunge) Hu et H. F. Chou | Suan Zao Ren    | Seed           |

**Supplementary Data, Table S2.** List of all pesticide residues screened (N=162).

| Pesticide Name       |
|----------------------|
| 3-Hydroxycarbofuran  |
| Acetochlor           |
| Alachlor             |
| Aldicarb (temik)     |
| Aldicarb sulfone     |
| Aldicarb sulfoxide   |
| Aldrin               |
| Alpha-cypermethrin   |
| Ametryne             |
| Aminocarb            |
| Atrazine             |
| Bendiocarb           |
| Benfluralin          |
| BHC, alpha           |
| BHC, beta            |
| BHC, delta           |
| Bifenoxy             |
| Bifenthrin           |
| Bromophos            |
| Bromophos-ethyl      |
| Bromopropylate       |
| Butachlor            |
| Butocarboxim         |
| Butoxycarboxim       |
| Carbaryl (Sevin)     |
| Carbofuran (Furadan) |
| Carbophenothion      |
| Chlordane, cis       |
| Chlordane, technical |
| Chlordane, trans     |
| Chlorfenvinphos      |
| Chlornitrofen        |
| Chlorobenzilate      |
| Chloroneb            |
| Chloroprotham        |
| Chloropropylate      |
| Chlorothalonil       |
| Chlorpyrifos         |
| Chlorpyrifos-methyl  |
| Chlorthiophos        |
| Cypermethrin         |
| Cyprodinil           |
| DCPA                 |
| DDE, o,p'            |
| DDE, p,p'            |
| DDT, o,p'            |
| DDT, p,p'            |
| DEF                  |
| Di-allate            |
| Dialifor             |
| Diazinon             |
| Dichlofenthion       |
| Dichlorofluanid      |
| Diclofop-methyl      |
| Dieldrin             |
| Difenoconazole       |
| Dinitramine          |
| Dioxacarb            |
| Diphenylamine        |
| Endosulfan I         |
| Endosulfan II        |

| Pesticide Name         |
|------------------------|
| Endosulfan Sulfate     |
| Endrin                 |
| Endrin ketone          |
| EPN                    |
| Esfenvalerate          |
| Ethalfuralin           |
| Ethiofencarb           |
| Ethiolate              |
| Ethion                 |
| Ethoxyquin             |
| Etridiazole            |
| Etrimfos               |
| Fenitrothion           |
| Fenobucarb             |
| Fenpropathrin          |
| Fenvalerate            |
| Fipronil               |
| Fluazifop-butyl        |
| Fluchoralin            |
| Fluvalinate            |
| Folpet                 |
| Fonofos                |
| Heptachlor             |
| Heptachlor epoxide     |
| Hexachlorobenzene      |
| Iprodione              |
| Isofenphos             |
| Isoproc carb           |
| Leptophos              |
| Lindane                |
| Malathion              |
| Metalaxyl              |
| Methiocarb             |
| Methomyl (Lannate)     |
| Methoprotryne          |
| Methoxychlor, o,p'     |
| Methoxychlor, p,p'     |
| Methoxychlorolefin     |
| Metolcarb              |
| Metribuzin             |
| Mirex                  |
| Myclobutanil           |
| Napropamide            |
| Nitralin               |
| Nitrofen               |
| Nonachlor, cis         |
| Nonachlor, trans       |
| Octachlor epoxide      |
| Ovex                   |
| Oxadiazon              |
| Oxamyl                 |
| Oxyfluorfen            |
| Parathion              |
| Parathion-methyl       |
| Pedimethalin           |
| Pentachloroaniline     |
| Pentachloroanisole     |
| Pentachlorobenzene     |
| Pentachlorothioanisole |
| Permethrins            |
| Perthane               |

| Pesticide Name               |
|------------------------------|
| Phenthoate                   |
| Phosalone                    |
| Pirimicarb                   |
| Pirimiphos-ethyl             |
| Pirimiphos-methyl            |
| Procyazine                   |
| Procymidone                  |
| Promecarb                    |
| Prometryne                   |
| Propetamphos                 |
| Propham                      |
| Propoxur                     |
| Prothiofos                   |
| Quinalphos                   |
| Quintozene                   |
| Ronnel                       |
| Simazine                     |
| Simetryn                     |
| Sulfallate                   |
| Sulfotep                     |
| TDE, o,p'                    |
| TDE, p, p'                   |
| TDE, p,p'-olefin             |
| Tecnazene                    |
| Terbufos-sulfone             |
| Terbumeton                   |
| Terbutylazine                |
| Terbutryne                   |
| Tetrachloroaniline           |
| Tetradifon                   |
| Tetrahydrophthalimide (THPI) |
| Tetramethrine                |
| Tetrasul                     |
| Thiabendazole                |
| Thiofanox                    |
| Toxaphene                    |
| Tri-allate                   |
| Trichloronat                 |
| Trifluralin                  |
| Vinclozolin                  |

**Supplementary Data, Table S3.** Reference values for pesticides and heavy metals.

| <b>Contaminant</b>   | <b>Type</b> | <b>Source of RfD/MRL</b>                                                                                                   | <b>RfD, PAD, or MRL<br/>(mg/kg body wt/day)</b> |
|----------------------|-------------|----------------------------------------------------------------------------------------------------------------------------|-------------------------------------------------|
| Arsenic              | Heavy Metal | ATSDR Acute, oral exposure                                                                                                 | 0.005                                           |
| Arsenic              | Heavy Metal | ATSDR Chronic, oral exposure                                                                                               | 0.0003                                          |
| Arsenic              | Heavy Metal | EPA-IRIS for Inorganic Arsenic,<br>Chronic Oral Exposure                                                                   | 0.0003                                          |
| Cadmium              | Heavy Metal | ATSDR Chronic Oral Exposure                                                                                                | 0.0001                                          |
| Cadmium              | Heavy Metal | ATSDR Int. Oral Exposure                                                                                                   | 0.0005                                          |
| Cadmium              | Heavy Metal | EPA-IRIS for Chronic Oral<br>Exposure in Food                                                                              | 0.001                                           |
| Chromium             | Heavy Metal | ATSDR Chronic Oral Exposure<br>(for Cr VI)                                                                                 | 0.001                                           |
| Chromium             | Heavy Metal | ATSDR Int. Oral Exposure (for Cr<br>VI)                                                                                    | 0.005                                           |
| Chromium             | Heavy Metal | EPA-IRIS Chronic Oral Exposure<br>(for Cr VI)                                                                              | 0.003                                           |
| Lead                 | Heavy Metal | JECFA (based on the provisional<br>tolerable weekly intake [PTWI] for<br>lead of 25 µg/kg body wt per<br>week)             | 0.0036                                          |
| Mercury              | Heavy Metal | ATSDR Chronic Oral Exposure to<br>Methyl Mercury                                                                           | 0.0003                                          |
| Mercury              | Heavy Metal | ATSDR Int. Oral Exposure to<br>Mercuric Chloride                                                                           | 0.002                                           |
| Mercury              | Heavy Metal | JECFA (based on the Provisional<br>Tolerable Weekly Intake [PTWI]<br>for inorganic mercury of 4 µg/kg<br>body wt per week) | 0.00057                                         |
| Alachlor             | Pesticide   | EPA ISTEP PAD, Acute Dietary,<br>Females 13-49                                                                             | 1.5                                             |
| Alachlor             | Pesticide   | EPA ISTEP PAD, Chronic Dietary,<br>General Population                                                                      | 0.01                                            |
| Atrazine             | Pesticide   | ATSDR Acute MRL                                                                                                            | 0.01                                            |
| Atrazine             | Pesticide   | ATSDR Int. MRL                                                                                                             | 0.003                                           |
| Atrazine             | Pesticide   | EPA ISTEP PAD, Acute Dietary,<br>Females 13-49                                                                             | 0.01                                            |
| Atrazine             | Pesticide   | EPA ISTEP PAD, Chronic Dietary,<br>General Population                                                                      | 0.0018                                          |
| Carbofuran (Furadan) | Pesticide   | EPA ISTEP PAD, Acute Dietary,<br>General Population                                                                        | 0.0002                                          |
| Chlorpyrifos         | Pesticide   | ATSDR Acute MRL                                                                                                            | 0.003                                           |
| Chlorpyrifos         | Pesticide   | ATSDR Chronic MRL                                                                                                          | 0.001                                           |
| Chlorpyrifos         | Pesticide   | EPA ISTEP PAD, Acute Dietary,<br>General Population                                                                        | 0.0005                                          |
| Chlorpyrifos         | Pesticide   | EPA ISTEP PAD, Chronic Dietary,<br>General Population                                                                      | 0.00003                                         |
| DDT, p,p'            | Pesticide   | ATSDR Acute MRL                                                                                                            | 0.0005                                          |
| DDT, p,p'            | Pesticide   | ATSDR Chronic MRL                                                                                                          | 0.0005                                          |

| <b>Contaminant</b> | <b>Type</b> | <b>Source of RfD/MRL</b>                              | <b>RfD, PAD, or MRL<br/>(mg/kg body wt/day)</b> |
|--------------------|-------------|-------------------------------------------------------|-------------------------------------------------|
| Diphenylamine      | Pesticide   | EPA ISTEP PAD, Chronic Dietary,<br>General Population | 0.1                                             |
| Endosulfan         | Pesticide   | ATSDR Chronic MRL                                     | 0.002                                           |
| Endosulfan         | Pesticide   | ATSDR Int. MRL                                        | 0.005                                           |
| Endosulfan         | Pesticide   | EPA ISTEP PAD, Acute Dietary,<br>General Population   | 0.051                                           |
| Endosulfan         | Pesticide   | EPA ISTEP PAD, Chronic Dietary,<br>General Population | 0.006                                           |
| Endrin             | Pesticide   | ATSDR Chronic MRL                                     | 0.0003                                          |
| Endrin             | Pesticide   | ATSDR Int. MRL                                        | 0.002                                           |
| Esfenvalerate      | Pesticide   | EPA ISTEP PAD, Acute Dietary,<br>General Population   | 0.0018                                          |
| Esfenvalerate      | Pesticide   | EPA ISTEP PAD, Chronic Dietary,<br>General Population | 0.0018                                          |
| Fenpropathrin      | Pesticide   | EPA ISTEP PAD, Acute Dietary,<br>General Population   | 0.06                                            |
| Fenpropathrin      | Pesticide   | EPA ISTEP PAD, Chronic Dietary,<br>General Population | 0.025                                           |
| Fenvalerate        | Pesticide   | EPA ISTEP PAD, Acute Dietary,<br>General Population   | 0.0018                                          |
| Fenvalerate        | Pesticide   | EPA ISTEP PAD, Chronic Dietary,<br>General Population | 0.0018                                          |
| Fipronil           | Pesticide   | EPA ISTEP PAD, Acute Dietary,<br>General Population   | 0.025                                           |
| Fipronil           | Pesticide   | EPA ISTEP PAD, Chronic Dietary,<br>General Population | 0.0002                                          |
| Iprodione          | Pesticide   | EPA ISTEP PAD, Acute Dietary,<br>Females 13-49        | 0.02                                            |
| Iprodione          | Pesticide   | EPA ISTEP PAD, Chronic Dietary,<br>General Population | 0.06                                            |
| Lindane            | Pesticide   | EPA ISTEP PAD, Acute Dietary,<br>General Population   | 0.02                                            |
| Lindane            | Pesticide   | EPA ISTEP PAD, Chronic Dietary,<br>General Population | 0.0016                                          |
| Malathion          | Pesticide   | ATSDR Chronic MRL                                     | 0.02                                            |
| Malathion          | Pesticide   | ATSDR Int. MRL                                        | 0.02                                            |
| Malathion          | Pesticide   | EPA ISTEP PAD, Acute Dietary,<br>General Population   | 0.076                                           |
| Malathion          | Pesticide   | EPA ISTEP PAD, Chronic Dietary,<br>General Population | 0.071                                           |
| Methomyl (Lannate) | Pesticide   | EPA ISTEP PAD, Acute Dietary,<br>General Population   | 0.02                                            |
| Methomyl (Lannate) | Pesticide   | EPA ISTEP PAD, Chronic Dietary,<br>General Population | 0.008                                           |
| Myclobutanil       | Pesticide   | EPA ISTEP PAD, Acute Dietary,<br>Females 13-49        | 0.6                                             |

| <b>Contaminant</b> | <b>Type</b> | <b>Source of RfD/MRL</b>                              | <b>RfD, PAD, or MRL<br/>(mg/kg body wt/day)</b> |
|--------------------|-------------|-------------------------------------------------------|-------------------------------------------------|
| Myclobutanil       | Pesticide   | EPA ISTEP PAD, Chronic Dietary,<br>General Population | 0.025                                           |
| Parathion-methyl   | Pesticide   | ATSDR Chronic MRL                                     | 0.0003                                          |
| Parathion-methyl   | Pesticide   | ATSDR Int. MRL                                        | 0.0007                                          |
| Parathion-methyl   | Pesticide   | EPA ISTEP PAD, Acute Dietary,<br>General Population   | 0.00011                                         |
| Parathion-methyl   | Pesticide   | EPA ISTEP PAD, Chronic Dietary,<br>General Population | 0.00002                                         |
| Permethrin         | Pesticide   | ATSDR Acute MRL                                       | 0.3                                             |
| Permethrin         | Pesticide   | ATSDR Int. MRL                                        | 0.2                                             |
| Permethrins        | Pesticide   | EPA ISTEP PAD, Acute Dietary,<br>General Population   | 0.25                                            |
| Permethrins        | Pesticide   | EPA ISTEP PAD, Chronic Dietary,<br>General Population | 0.25                                            |
| Procymidone        | Pesticide   | EPA ISTEP PAD, Acute Dietary,<br>Females 13-49        | 0.035                                           |
| Quintozene         | Pesticide   | EPA ISTEP PAD, Chronic Dietary,<br>General Population | 0.001                                           |
| Terbufos           | Pesticide   | EPA ISTEP PAD, Acute Dietary,<br>General Population   | 0.0003                                          |
| Terbufos           | Pesticide   | EPA ISTEP PAD, Chronic Dietary,<br>General Population | 0.00005                                         |
| Trifluralin        | Pesticide   | EPA ISTEP PAD, Acute Dietary,<br>Females 13-49        | 1                                               |
| Trifluralin        | Pesticide   | EPA ISTEP PAD, Chronic Dietary,<br>General Population | 0.024                                           |

ATSDR = Agency for Toxic Substances and Disease Registry (ATSDR, 2010)

EPA-IRIS = Environmental Protection Agency Integrated Risk Information System (US EPA, 2010)

EPA-ISTEP = Environmental Protection Agency (EPA) Office of Pesticide Programs ISTEP Toxicology Endpoint Selection Database (David J. Miller, Chief, Chemistry & Exposure Branch, Office of Pesticide Programs, EPA, email communication, April 2010)

JECFA-PTWI = Joint FAO/WHO Expert Committee On Food Additives, Provisional Tolerable Weekly Intake (Pb: JECFA, 2000; Hg: JECFA, 2010)

RfD = Reference Dose

PAD = Population Adjusted Dose

MRL = Minimal Risk Level (ATSDR, 2010)

**Supplementary Data, Table S4.** Summary of pesticide residues detected (LOD=10–50 ppb; total of 162 pesticides screened) in raw Chinese Herbal Medicines (Total N=294).

| Pesticide Name       | United States Registration Status | General Summary Statistics for samples with detectable levels  |                    |              |               | Comparison with EPA-ISTEP PAD values                         |                                                                |                                                              |                                                                | Comparison with ATSDR Minimal Risk Level (MRL) values (ATSDR, 2010) |                                                                |                                                              |                                                                | Comparison with Levels in EU Pesticides Database (EUP, 2010) for Dried Herbal Infusions and FDA Action Levels* |          |           |
|----------------------|-----------------------------------|----------------------------------------------------------------|--------------------|--------------|---------------|--------------------------------------------------------------|----------------------------------------------------------------|--------------------------------------------------------------|----------------------------------------------------------------|---------------------------------------------------------------------|----------------------------------------------------------------|--------------------------------------------------------------|----------------------------------------------------------------|----------------------------------------------------------------------------------------------------------------|----------|-----------|
|                      |                                   | # Samples with Detectable Pesticide (% samples in parentheses) | Value if N=1 (ppb) | Median (ppb) | Minimum (ppb) | Maximum (ppb)                                                | Herb Taken as Soup/Tea, Assuming 10% Leaching                  | Whole Herb Ingested                                          | Herb Taken as Soup/Tea, Assuming 10% Leaching                  | Whole Herb Ingested                                                 | Herb Taken as Soup/Tea, Assuming 10% Leaching                  | Whole Herb Ingested                                          | EU Maximum Residue Level or FDA Action Level† (ppb)            | # Samples > Level (% samples in parentheses)                                                                   |          |           |
|                      |                                   |                                                                |                    |              |               | # Samples > 1% PAD (% samples in parentheses) Acute Exposure | # Samples > 1% PAD (% samples in parentheses) Chronic Exposure | # Samples > 1% PAD (% samples in parentheses) Acute Exposure | # Samples > 1% PAD (% samples in parentheses) Chronic Exposure | # Samples > 1% MRL (% samples in parentheses) Acute Exposure        | # Samples > 1% MRL (% samples in parentheses) Chronic Exposure | # Samples > 1% MRL (% samples in parentheses) Acute Exposure | # Samples > 1% MRL (% samples in parentheses) Chronic Exposure |                                                                                                                |          |           |
| Alachlor             | Registered                        | 1 (0.3%)                                                       | 55                 |              |               | 0 (0%)                                                       | 0 (0%)                                                         | 0 (0%)                                                       | 0 (0%)                                                         |                                                                     |                                                                |                                                              |                                                                | 50                                                                                                             | 1 (0.3%) |           |
| Atrazine             | Registered                        | 2 (0.7%)                                                       |                    | 92           | 30            | 155                                                          | 0 (0%)                                                         | 0 (0%)                                                       | 0 (0%)                                                         | 0 (0%)                                                              | 0 (0%)                                                         | 0 (0%)                                                       | 0 (0%)                                                         | 100                                                                                                            | 1 (0.3%) |           |
| BHC, alpha           | Not Registered*                   | 2 (0.7%)                                                       |                    | 93           | 20            | 166                                                          |                                                                |                                                              |                                                                |                                                                     |                                                                |                                                              |                                                                | 50*                                                                                                            | 1 (0.3%) |           |
| BHC, beta            | Not Registered*                   | 6 (2%)                                                         |                    | 44           | 28            | 120                                                          |                                                                |                                                              |                                                                |                                                                     |                                                                |                                                              |                                                                | 50*                                                                                                            | 2 (0.7%) |           |
| BHC, delta           | Not Registered*                   | 1 (0.3%)                                                       | 650                |              |               |                                                              |                                                                |                                                              |                                                                |                                                                     |                                                                |                                                              |                                                                | 50*                                                                                                            | 1 (0.3%) |           |
| BifenoX              | Not Registered                    | 3 (1%)                                                         |                    | 12           | 11            | 13                                                           |                                                                |                                                              |                                                                |                                                                     |                                                                |                                                              |                                                                | 50                                                                                                             | 0 (0%)   |           |
| Carbofuran (Furadan) | Registered                        | 1 (0.3%)                                                       | 13                 |              |               |                                                              | 0 (0%)                                                         | 0 (0%)                                                       |                                                                |                                                                     |                                                                |                                                              |                                                                | 50                                                                                                             | 0 (0%)   |           |
| Chloropropylate      | Not Registered                    | 1 (0.3%)                                                       | 67                 |              |               |                                                              |                                                                |                                                              |                                                                |                                                                     |                                                                |                                                              |                                                                |                                                                                                                |          |           |
| Chlorpyrifos         | Registered                        | 76 (25.9%)                                                     |                    | 68           | 10            | 2955000                                                      | 14 (4.8%)                                                      | 66 (22.4%)                                                   | 60 (20.4%)                                                     | 75 (25.5%)                                                          | 5 (1.7%)                                                       | 13 (4.4%)                                                    | 18 (6.1%)                                                      | 37 (12.6%)                                                                                                     | 500      | 13 (4.4%) |
| DDE, p,p'            | Not Registered*                   | 1 (0.3%)                                                       | 243                |              |               |                                                              |                                                                |                                                              |                                                                |                                                                     |                                                                |                                                              |                                                                | 20*                                                                                                            | 1 (0.3%) |           |
| DDT, o,p'            | Not Registered*                   | 1 (0.3%)                                                       | 203                |              |               |                                                              |                                                                |                                                              |                                                                |                                                                     |                                                                |                                                              |                                                                | 20*                                                                                                            | 1 (0.3%) |           |
| DDT, p,p'            | Not Registered*                   | 2 (0.7%)                                                       |                    | 144          | 43            | 246                                                          |                                                                |                                                              |                                                                |                                                                     | 0 (0%)                                                         | 0 (0%)                                                       | 2 (0.7%)                                                       | 2 (0.7%)                                                                                                       | 500      | 0 (0%)    |
| Diphenylamine        | Registered                        | 1 (0.3%)                                                       | 159                |              |               |                                                              |                                                                | 0 (0%)                                                       | 0 (0%)                                                         |                                                                     |                                                                |                                                              |                                                                | 50                                                                                                             | 1 (0.3%) |           |
| Endosulfan I         | Registered                        | 1 (0.3%)                                                       | 47                 |              |               |                                                              | 0 (0%)                                                         | 0 (0%)                                                       | 0 (0%)                                                         | 0 (0%)                                                              | 0 (0%)                                                         | 0 (0%)                                                       | 0 (0%)                                                         | 500                                                                                                            | 0 (0%)   |           |
| Endrin               | Not Registered                    | 1 (0.3%)                                                       | 59                 |              |               |                                                              |                                                                |                                                              |                                                                | 0 (0%)                                                              | 0 (0%)                                                         | 0 (0%)                                                       | 1 (0.3%)                                                       | 100                                                                                                            | 0 (0%)   |           |
| Esfenvalerate        | Registered                        | 4 (1.4%)                                                       |                    | 68           | 45            | 731                                                          | 0 (0%)                                                         | 0 (0%)                                                       | 1 (0.3%)                                                       | 1 (0.3%)                                                            |                                                                |                                                              |                                                                | 50                                                                                                             | 3 (1.0%) |           |
| Ethiolate            | Not Registered                    | 3 (1%)                                                         |                    | 84           | 80            | 87                                                           |                                                                |                                                              |                                                                |                                                                     |                                                                |                                                              |                                                                |                                                                                                                |          |           |
| Fenobucarb           | Not Registered                    | 2 (0.7%)                                                       |                    | 45           | 44            | 45                                                           |                                                                |                                                              |                                                                |                                                                     |                                                                |                                                              |                                                                |                                                                                                                |          |           |
| Fenpropathrin        | Registered                        | 5 (1.7%)                                                       |                    | 34           | 20            | 101                                                          | 0 (0%)                                                         | 0 (0%)                                                       | 0 (0%)                                                         | 0 (0%)                                                              |                                                                |                                                              |                                                                | 20                                                                                                             | 5 (1.7%) |           |
| Fenvalerate          | Registered                        | 2 (0.7%)                                                       |                    | 126          | 36            | 215                                                          | 0 (0%)                                                         | 0 (0%)                                                       | 1 (0.3%)                                                       | 1 (0.3%)                                                            |                                                                |                                                              |                                                                | 50                                                                                                             | 1 (0.3%) |           |
| Fipronil             | Registered                        | 1 (0.3%)                                                       | 50                 |              |               |                                                              | 0 (0%)                                                         | 0 (0%)                                                       | 0 (0%)                                                         | 1 (0.3%)                                                            |                                                                |                                                              |                                                                | 5                                                                                                              | 1 (0.3%) |           |
| Iprodione            | Registered                        | 2 (0.7%)                                                       |                    | 39           | 23            | 56                                                           | 0 (0%)                                                         | 0 (0%)                                                       | 0 (0%)                                                         | 0 (0%)                                                              |                                                                |                                                              |                                                                | 100                                                                                                            | 0 (0%)   |           |
| Isoprocarb           | Not Registered                    | 3 (1%)                                                         |                    | 62           | 16            | 2020                                                         |                                                                |                                                              |                                                                |                                                                     |                                                                |                                                              |                                                                |                                                                                                                |          |           |
| Lindane              | Not Registered*                   | 4 (1.4%)                                                       |                    | 39           | 26            | 125                                                          | 0 (0%)                                                         | 0 (0%)                                                       | 0 (0%)                                                         | 1 (0.3%)                                                            |                                                                |                                                              |                                                                | 1000                                                                                                           | 0 (0%)   |           |
| Malathion            | Registered                        | 2 (0.7%)                                                       |                    | 16           | 14            | 18                                                           | 0 (0%)                                                         | 0 (0%)                                                       | 0 (0%)                                                         | 0 (0%)                                                              | 0 (0%)                                                         | 0 (0%)                                                       | 0 (0%)                                                         | 500                                                                                                            | 0 (0%)   |           |
| Methomyl (Lannate)   | Registered                        | 1 (0.3%)                                                       | 478                |              |               |                                                              | 0 (0%)                                                         | 0 (0%)                                                       | 0 (0%)                                                         | 0 (0%)                                                              |                                                                |                                                              |                                                                | 100                                                                                                            | 1 (0.3%) |           |
| Myclobutamil         | Registered                        | 1 (0.3%)                                                       | 105                |              |               |                                                              | 0 (0%)                                                         | 0 (0%)                                                       | 0 (0%)                                                         | 0 (0%)                                                              |                                                                |                                                              |                                                                | 50                                                                                                             | 1 (0.3%) |           |
| Nonachlor, cis       | Not Registered                    | 1 (0.3%)                                                       | 21                 |              |               |                                                              |                                                                |                                                              |                                                                |                                                                     |                                                                |                                                              |                                                                |                                                                                                                |          |           |
| Parathion            | Not Registered                    | 5 (1.7%)                                                       |                    | 49           | 14            | 1810                                                         |                                                                |                                                              |                                                                |                                                                     |                                                                |                                                              |                                                                | 100                                                                                                            | 2 (0.7%) |           |
| Parathion-methyl     | Registered                        | 4 (1.4%)                                                       |                    | 39           | 19            | 65                                                           | 0 (0%)                                                         | 4 (1.4%)                                                     | 4 (1.4%)                                                       | 4 (1.4%)                                                            | 0 (0%)                                                         | 0 (0%)                                                       | 2 (0.7%)                                                       | 3 (1.0%)                                                                                                       | 50       | 2 (0.7%)  |
| Pentachloroaniline   | Registered                        | 1 (0.3%)                                                       | 30                 |              |               |                                                              |                                                                |                                                              |                                                                |                                                                     |                                                                |                                                              |                                                                | 100                                                                                                            | 0 (0%)   |           |
| Permethrin           | Registered                        | 2 (0.7%)                                                       |                    | 73           | 60            | 87                                                           | 0 (0%)                                                         | 0 (0%)                                                       | 0 (0%)                                                         | 0 (0%)                                                              | 0 (0%)                                                         | 0 (0%)                                                       | 0 (0%)                                                         | 100                                                                                                            | 0 (0%)   |           |
| Procymidone          | Registered                        | 3 (1%)                                                         |                    | 149          | 83            | 400                                                          | 0 (0%)                                                         | 0 (0%)                                                       | 0 (0%)                                                         |                                                                     |                                                                |                                                              |                                                                | 100                                                                                                            | 2 (0.7%) |           |
| Quintozene           | Registered                        | 1 (0.3%)                                                       | 85                 |              |               |                                                              |                                                                | 0 (0%)                                                       |                                                                | 1 (0.3%)                                                            |                                                                |                                                              |                                                                | 100                                                                                                            | 0 (0%)   |           |
| Sulfotep             | Not Registered                    | 6 (2%)                                                         |                    | 47           | 12            | 1511                                                         |                                                                |                                                              |                                                                |                                                                     |                                                                |                                                              |                                                                |                                                                                                                |          |           |
| TDE, o,p'            | Not Registered*                   | 1 (0.3%)                                                       | 202                |              |               |                                                              |                                                                |                                                              |                                                                |                                                                     |                                                                |                                                              |                                                                | 20*                                                                                                            | 1 (0.3%) |           |
| TDE, p, p'           | Not Registered*                   | 2 (0.7%)                                                       |                    | 140          | 49            | 232                                                          |                                                                |                                                              |                                                                |                                                                     |                                                                |                                                              |                                                                | 20*                                                                                                            | 2 (0.7%) |           |
| TDE, p,p'-olefin     | Not Registered*                   | 1 (0.3%)                                                       | 53                 |              |               |                                                              |                                                                |                                                              |                                                                |                                                                     |                                                                |                                                              |                                                                | 20*                                                                                                            | 1 (0.3%) |           |
| Terbufos-sulfone     | Registered                        | 1 (0.3%)                                                       | 11                 |              |               |                                                              | 0 (0%)                                                         | 0 (0%)                                                       | 0 (0%)                                                         | 1 (0.3%)                                                            |                                                                |                                                              |                                                                | 10                                                                                                             | 1 (0.3%) |           |
| Tetrachloroaniline   | Not Registered                    | 1 (0.3%)                                                       | 30                 |              |               |                                                              |                                                                |                                                              |                                                                |                                                                     |                                                                |                                                              |                                                                |                                                                                                                |          |           |
| Thiofanox            | Not Registered                    | 2 (0.7%)                                                       |                    | 11           | 10            | 11                                                           |                                                                |                                                              |                                                                |                                                                     |                                                                |                                                              |                                                                |                                                                                                                |          |           |
| Trifluralin          | Registered                        | 1 (0.3%)                                                       | 61                 |              |               |                                                              | 0 (0%)                                                         | 0 (0%)                                                       | 0 (0%)                                                         | 0 (0%)                                                              |                                                                |                                                              |                                                                | 100                                                                                                            | 0 (0%)   |           |

\*Pesticide is no longer registered for use in the United States, but the FDA has established an Action Level (US FDA, 2009).

All calculations were done using the maximum daily dose of the herb (CPC, 2005) and assuming a body weight of 70 kg.



## **References**

ATSDR (Agency for Toxic Substances and Disease Registry) [Internet]. ATSDR Minimal Risk Levels for Hazardous Substances (MRLs). [cited 2010 Sept 16]. Available from: <http://www.atsdr.cdc.gov/mrls/index.html>

CPC (Chinese Pharmacopoeia Commission). Pharmacopoeia of the Peoples Republic of China: 2005. Beijing, China: People's Medical Publishing House; 2005.

EUP (European Union Pharmacopoeia) [Internet]. European Union Pharmacopoeia Pesticides Database. [cited 2010 Oct 10]. Available from: [http://ec.europa.eu/sanco\\_pesticides/public/index.cfm](http://ec.europa.eu/sanco_pesticides/public/index.cfm)

JECFA (Joint FAO/WHO Expert Committee on Food Additives). Evaluation of Certain Food Additives and Contaminants. WHO Technical Report Series No. 837. Geneva, Switzerland: WHO; 2000.

JECFA (Joint Food and Agricultural Organization of the United Nations/World Health Organization Expert Committee on Food Additives). JECFA Seventy-second meeting Rome, 16-25 February 2010. Geneva, Switzerland: WHO; 2010.

US EPA (United States Environmental Protection Agency) [Internet]. Integrated Risk Information System (IRIS). [cited 2010 Nov 17]. Available from: <http://www.epa.gov/iris>

US FDA (United States Food and Drug Administration) [Internet]. Pesticide Residues in Food and Feed - Enforcement Criteria (CPG Sec. 575.100). [updated 2009 Sept 12; cited 2010 Oct 10]. Available from: <http://www.fda.gov/iceci/compliancemanuals/compliancepolicyguidancemanual/ucm123236.htm>
